# Supplementary material for: Human induced pluripotent stem cells generated from STING-associated vasculopathy with onset in infancy (SAVI) patients with a heterozygous mutation in the STING gene
Source: PubMed Central journal article supplement — Stem Cell Res. Author manuscript; Available in PMC 2022 Dec 29. (PMC9799028; doi:10.1016/j.scr.2022.102974), 2022-11-14
Supplement: NIHMS1852517-supplement-MMC4.pdf [file NIHMS1852517-supplement-MMC4.pdf]

**Date Reported:** Monday, June 24, 2019

**Cell Line:** iPSC SNP-1

**Passage#:** 30

**Date of Sample:** 6/13/2019

**Specimen:** Human IPS

**Results:** 46,XX

**Cell Line Sex:** Female

**Reason for Testing:** none given

**Investigator:** Guibin Chen, NIH

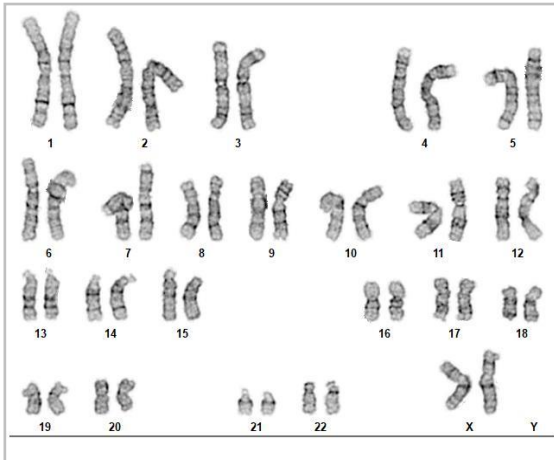

**Cell:** 34

**Slide:** G03

**Slide Type:** Karyotype

**Total Counted:** 20

**Total Analyzed:** 8

**Total Karyogrammed:** 4

**Band Resolution:** 400 - 525

**Interpretation:**

**This is a normal karyotype; no clonal abnormalities were detected at the stated band level of resolution.**

**Completed by:** Pam Mill

**Reviewed and Interpreted by:** Jennifer Laffin, PhD, FACMG

**Date:** \_\_\_\_\_ **Sent By:** \_\_\_\_\_ **Sent To:** \_\_\_\_\_ **QC Review By:** \_\_\_\_\_

*Limitations: This assay allows for microscopic visualization of numerical and structural chromosome abnormalities. The size of structural abnormality that can be detected is >3-10Mb, dependent upon the G-band resolution obtained from this specimen. For the purposes of this report, band level is defined as the number of G-bands per haploid genome. It is documented here as "band level", i.e., the range of bands determined from the four karyograms in this assay. Detection of heterogeneity of clonal cell populations in this specimen (i.e., mosaicism) is limited by the number of metaphase cells examined, documented here as "# of cells counted".*

*This assay was conducted solely for listed investigator/institution. The results of this assay are for research use only. Unless otherwise mutually agreed in writing, the services provided to you hereunder by WiCell Research Institute, Inc. ("WiCell") are governed solely by WiCell's Terms and Conditions of Service, found at [www.wicell.org/privacyandterms](http://www.wicell.org/privacyandterms). Any terms you may attach to a purchase order or other document that are inconsistent, add to, or conflict with WiCell's Terms and Conditions of Service are null and void and of no legal force or effect.*
